# Supplementary material for: Postzygotic isolation is stronger between sympatric species of three divergent taxa
Source: bioRxiv or medRxiv preprint supplement (doi:10.1101/2021.05.06.442525), 2026-05-13
Supplement: Supplementary file [file media-1.pdf]

# SUPPLEMENTARY MATERIAL

## Reinforcement alone does not explain increased reproductive isolation in sympatry

Daniel R. Matute and Brandon S. Cooper

1

### This PDF file includes:

Figures S1 to S9

Tables S1 to S8

2

3 **FIGURE S1.** 4PL regression parameters for *Drosophila* .....2

4 **FIGURE S2.** *Drosophila* 4PL regression parameters after phylogenetic subsamplings at  
5 the species group level.....3

6 **FIGURE S3.** 4PL regression parameters for Lepidopterans and *Bufo* frogs.....4

7 **FIGURE S4.** Comparisons of RI depend greatly on divergence time.....5

8 **FIGURE S5.** Postzygotic isolation evolves faster in sympatric species than in allopatric  
9 species when the data set is restricted to 'young' species.....6

10 **FIGURE S6.** The association between pre mating and postzygotic asymmetries is  
11 contingent on the way that data are filtered in *Drosophila*.....7

12 **FIGURE S7.** Mean pre mating and postzygotic RI are higher in sympatry in *Drosophila*  
13 but the ranges are overlapping.....8

14 **FIGURE S8.** The range of postzygotic isolation in sympatry is similar to that in allopatry  
15 in Lepidopterans and in *Bufo* toads.....9

16 **FIGURE S9.** Pre mating isolation accumulates faster in sympatric than in allopatric  
17 *Drosophila* species, even after including previously estimated metrics of pre mating  
18 isolation in allopatric population pairs of the same species.....10

19 **TABLE S1.** 4PL models fit the data better than linear regressions.....11

20 **TABLE S2.** Pairwise comparisons between coefficients of the four-parameter logistic  
21 model between sympatric and allopatric species.....12

22 **TABLE S3.** Coefficients for a phylogenetically informed linear regression for pre mating  
23 and postzygotic isolation between *Drosophila* species pairs.....14

24 **TABLE S4.** Regression coefficients from a phylogenetically informed regression for  
25 postzygotic isolation between Lepidopteran and *Bufo* species pairs.....15

26 **TABLE S5.** Young species show faster accumulation of postzygotic isolation when they  
27 are sympatric than when they are allopatric in *Bufo* frogs.....16

28 **TABLE S6.** Linear models show that the overlap of geographic range significantly  
29 affects the magnitude of pre mating and postzygotic isolation between *Drosophila*  
30 species pairs.....17

31 **TABLE S7.** The effect of geographic overlap on the effect of the magnitude of  
32 pre mating and postzygotic RI is mostly driven by species with disjoint geographic  
33 ranges. ....18

34 **TABLE S8.** Datasets that have compiled data on the magnitude of reproductive  
35 isolation in multiple species pairs.....19

36 **FIGURE S1. 4PL regression parameters for *Drosophila*.** The density plots  
 37 correspond to *a* (left), *b* (middle), and *d* (right) for premating isolation (top) and  
 38 postzygotic isolation (bottom). Blue: sympatric; red: allopatric. The values of *c*, the  
 39 fourth parameter of the regression, are shown in Figure 1.

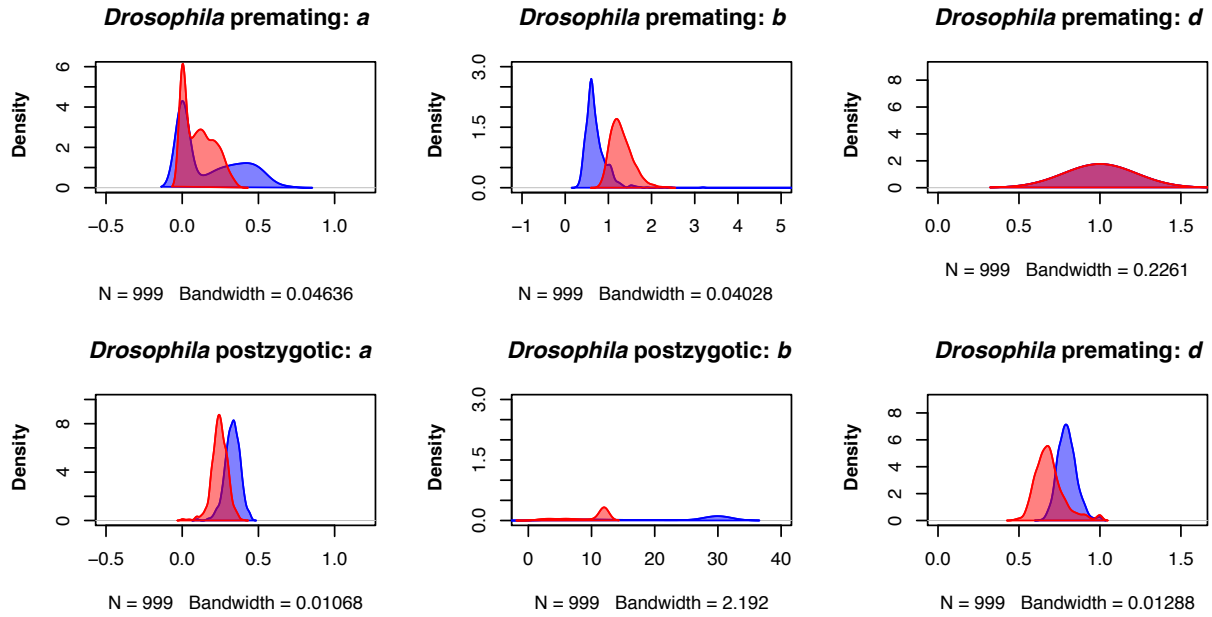

40  
 41

42 **FIGURE S2. *Drosophila* 4PL regression parameters after phylogenetic**  
 43 **subsamplings at the species-group level.** The density plots correspond to *a* (left), *b*  
 44 (middle left), *c* (middle right), and *d* (right) for prematuring isolation (top) and postzygotic  
 45 isolation (bottom). Blue: sympatric; red: allopatric.

46

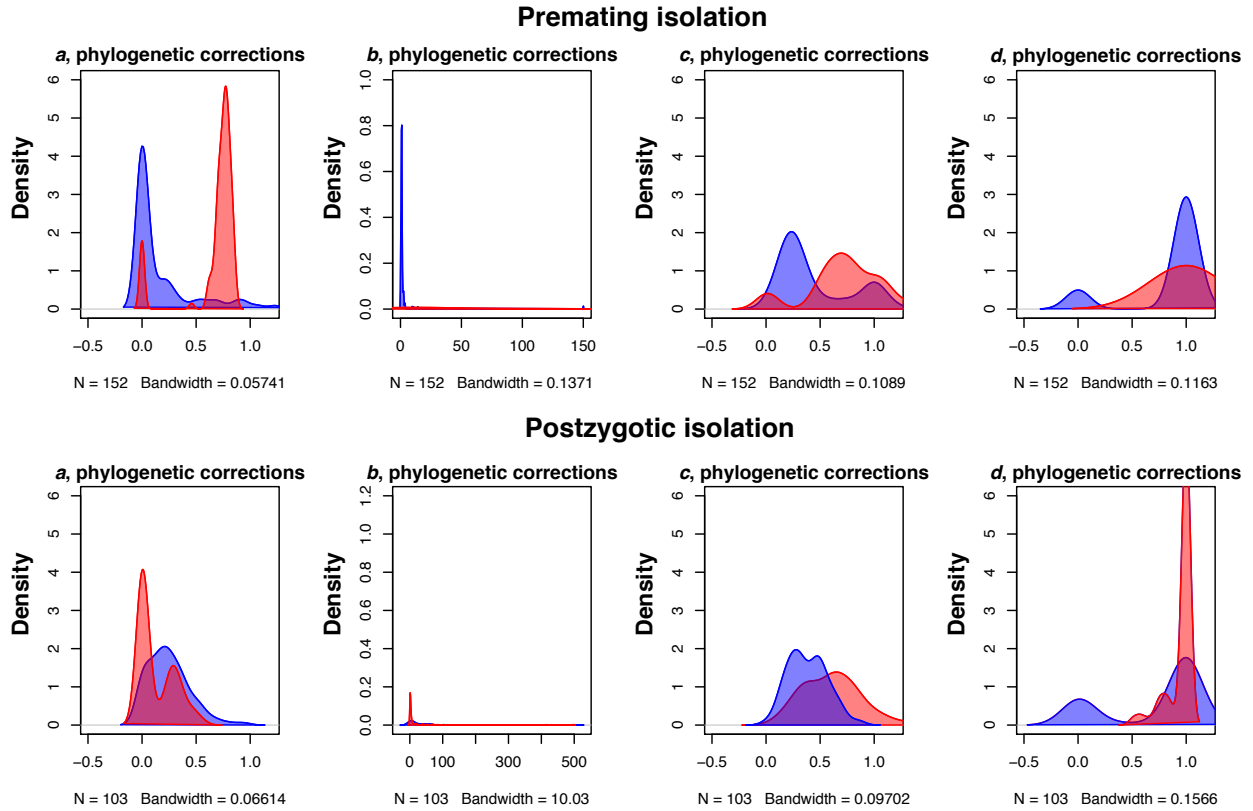

47

48

49 **FIGURE S3. 4PL regression parameters for Lepidopterans and *Bufo* frogs.** The  
 50 density plots correspond to *a* (left), *b* (middle), and *d* (right). Blue: sympatric; red:  
 51 allopatric. The values of *c*, the fourth parameter of the regression, are shown in Figure  
 52 2.

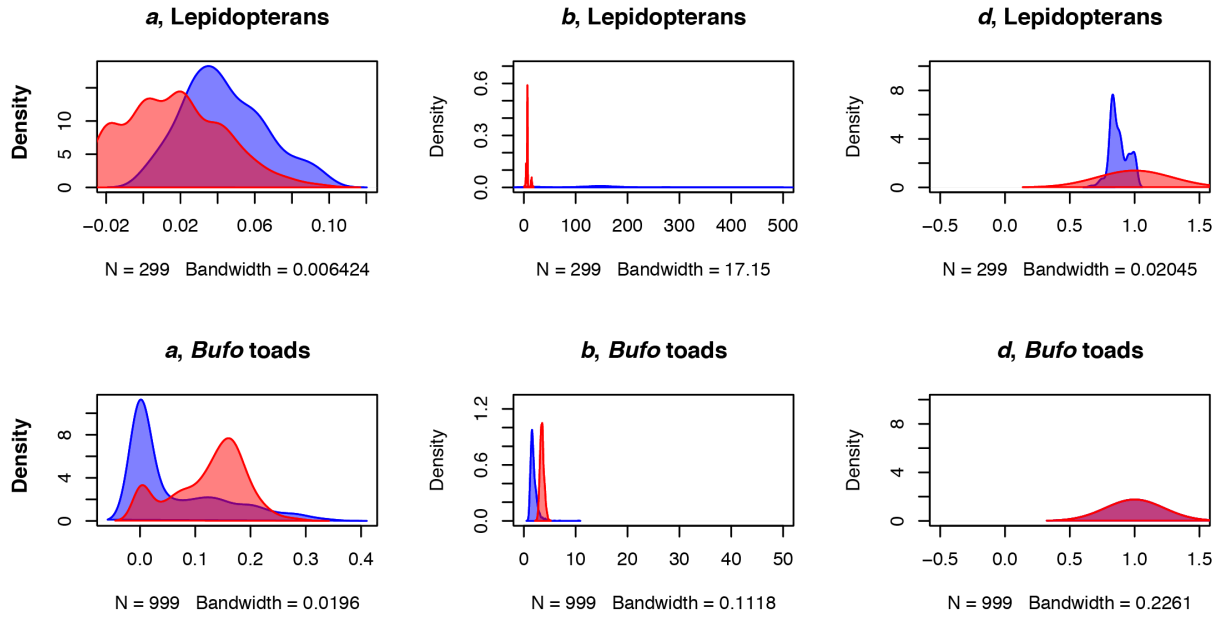

53  
 54  
 55

56 **FIGURE S4. Comparisons of RI depend greatly on divergence time.** Wilcoxon tests  
57 comparing the strength of prezygotic (black) and postzygotic (purple) RI in sympatry and  
58 allopatry when using different thresholds to define young species. The solid horizontal  
59 line indicates the threshold of significance defined by Coyne and Orr (1, 2). Shaded  
60 intervals represent 95% confidence intervals.  
61

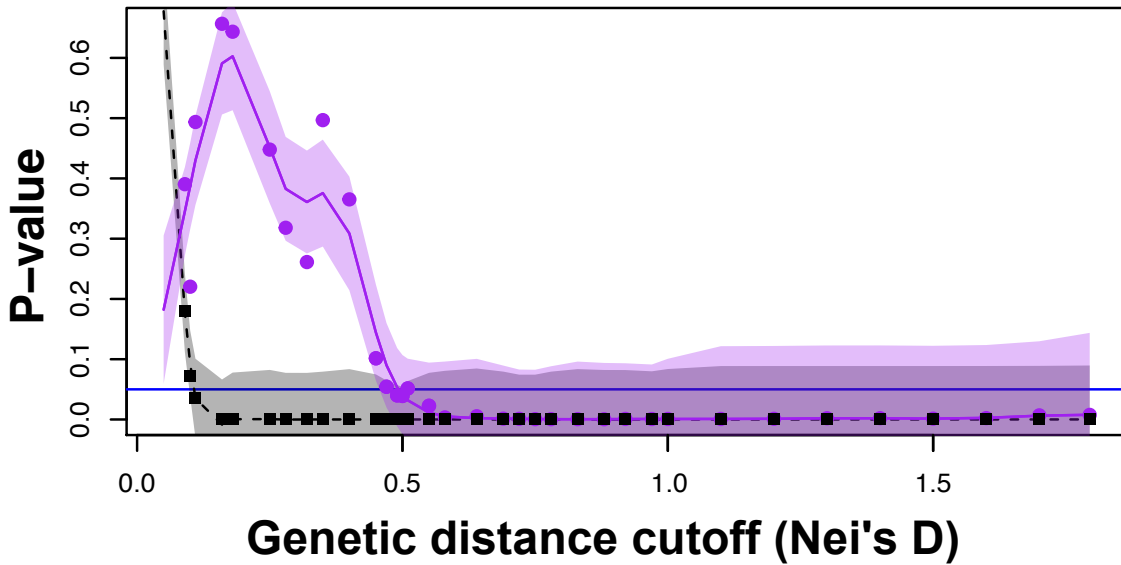

62  
63  
64  
65  
66  
67  
68  
69  
70  
71  
72  
73  
74  
75  
76  
77  
78  
79  
80  
81  
82  
83  
84  
85  
86  
87

88 **FIGURE S5. Postzygotic isolation evolves faster in sympatric species than in**  
 89 **allopatric species when the data set is restricted to ‘young’ species.** For these  
 90 analyses we defined young as the species with the third lowest divergence time (i.e.,  
 91 Nei’s  $D < 0.5$  for *Drosophila* and NJ distance  $< 0.05$  for *Bufo*). 4PL regressions in the  
 92 youngest *Drosophila* (Nei’s  $D < 0.51$ ) and youngest *Bufo* species (Nei’s  $D < 0.51$ ) show  
 93 similar results to the full range of divergence. In both cases (young species and full  
 94 divergence), sympatric species pairs show an earlier inflection point. Note that we did  
 95 not do the same analyses for Lepidopterans as the 4PL regressions did not converge in  
 96 datasets that did not include all the data.  
 97

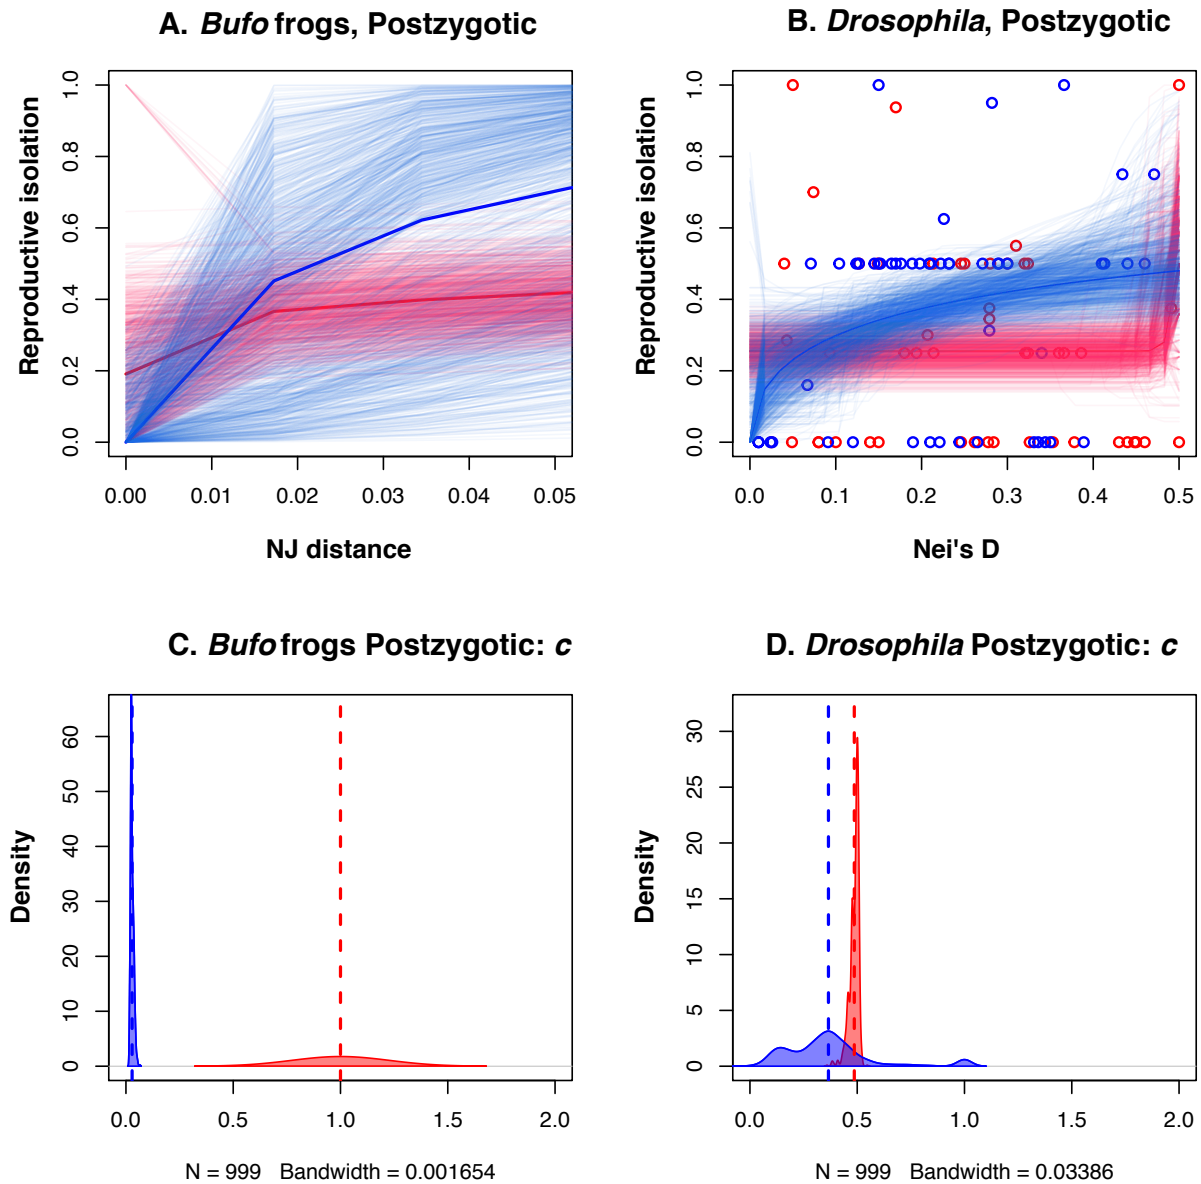

98

99 **FIGURE S6. The association between premating and postzygotic asymmetries is**  
 100 **contingent on the way that data are filtered in *Drosophila*.** The y-axis shows the  
 101 significance ( $P$ -value) of a Wilcoxon rank sum test with continuity correction. **A.**  
 102 Correlation between premating and postzygotic isolation when we used a lower  
 103 threshold (i.e., including data from the lower threshold to the maximum of the range) for  
 104 allopatric (red) and sympatric (blue) species. **B.** Correlation between premating and  
 105 postzygotic isolation when we used an upper threshold (i.e., including data from 0 to the  
 106 upper threshold) for allopatric (red) and sympatric (blue) species.

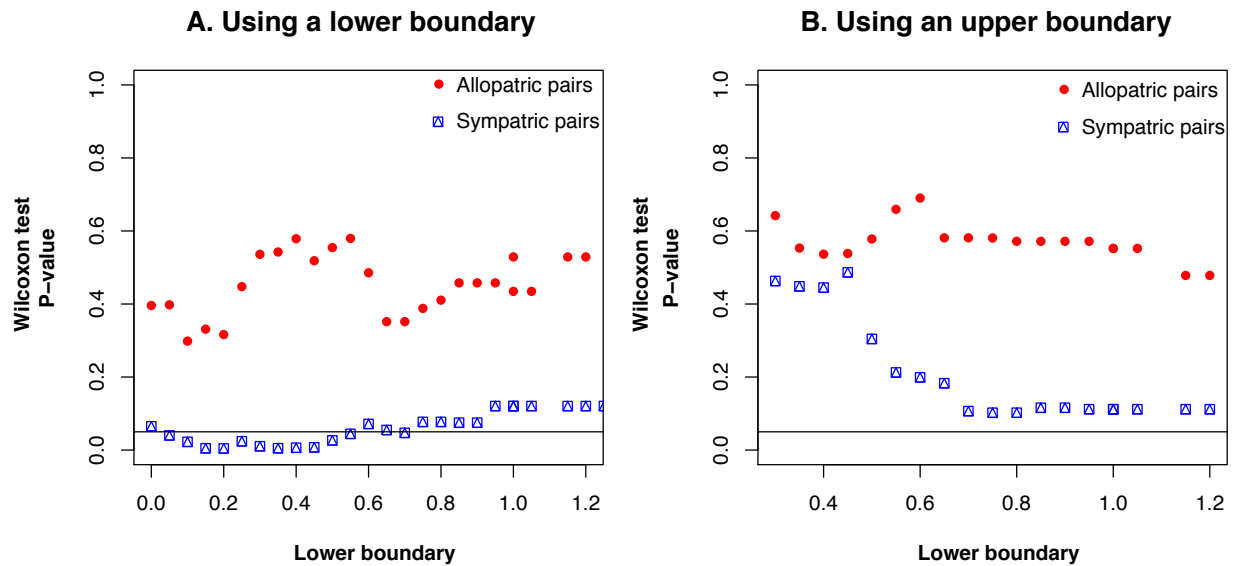

107  
 108  
 109

110 **FIGURE S7. Mean pre mating and postzygotic RI are higher in sympatry in**  
 111 ***Drosophila* but the ranges are overlapping.** Premating (A) and postzygotic (B) RI in  
 112 sympatry (S) is a subset of the range in allopatry (A). This result for premating (C) and  
 113 postzygotic (D) RI is independent of the arbitrary threshold chosen to define young  
 114 species. Similar plots for postzygotic RI in Lepidopterans and *Bufo* are shown in Figure  
 115 S8.

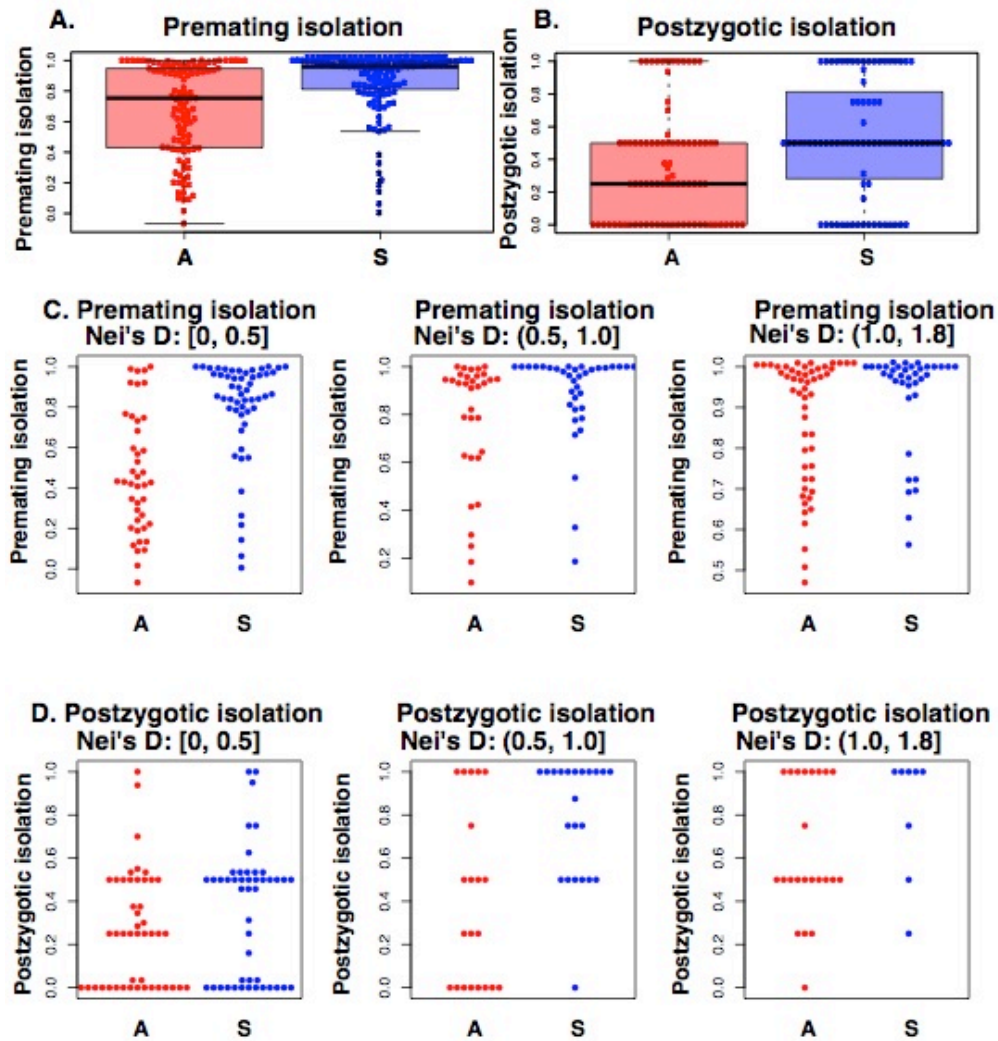

116  
 117



118 **FIGURE S8. The range of postzygotic isolation in sympatry is similar to that in**  
 119 **allopatry in Lepidopterans and in *Bufo* toads.** Regardless of the cutoff of genetic  
 120 distance, the range of postzygotic isolation usually overlaps with the range of RI in  
 121 allopatry (highly diverged Lepidopterans being an exception). Top panels:  
 122 Lepidopterans; lower panels: *Bufo* frogs.

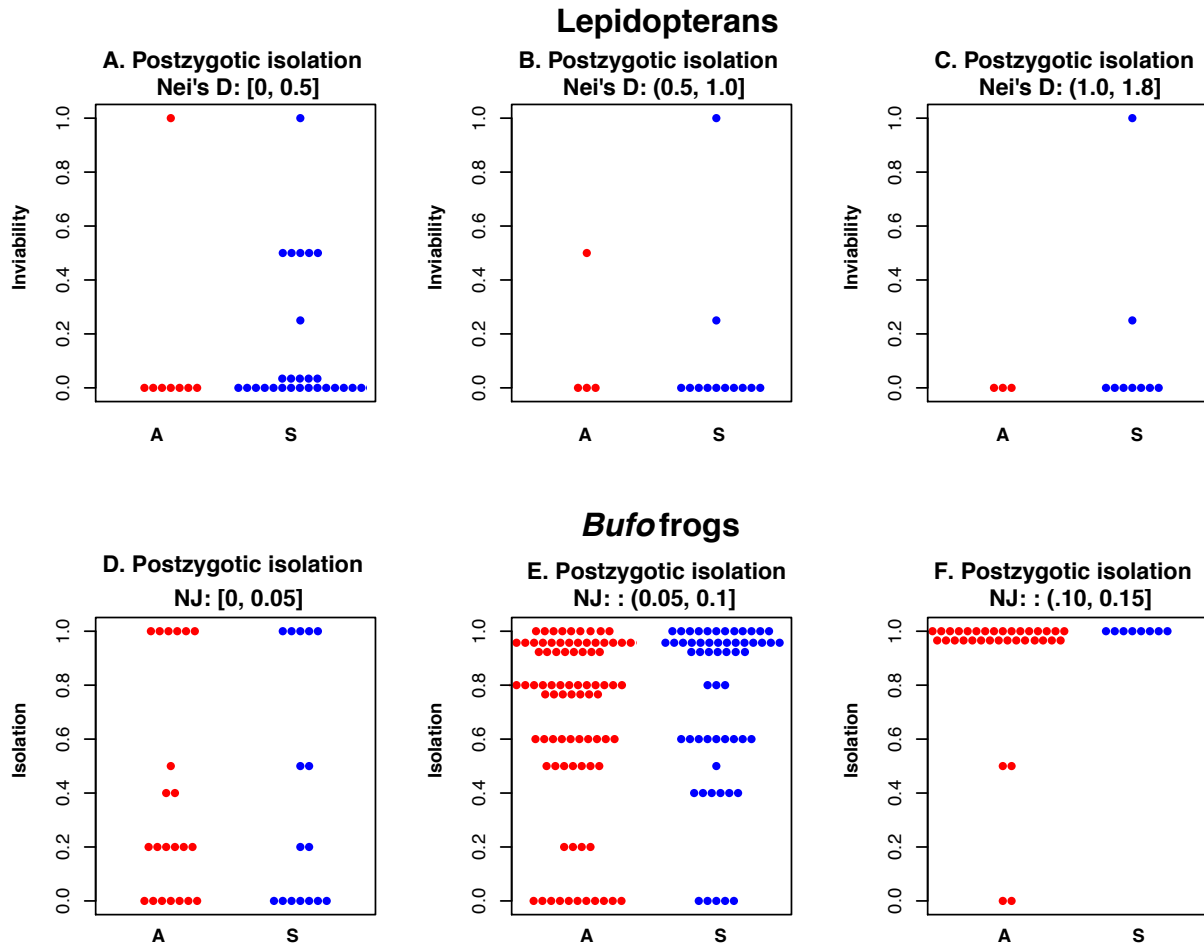

123  
124

125 **FIGURE S9. Premating isolation accumulates faster in sympatric than in allopatric**  
126 ***Drosophila* species, even after including previously estimated metrics of**  
127 **premating isolation in allopatric population pairs of the same species. These**  
128 **estimates are similar to the ones shown in Figures 1 and S1 but include metrics of**  
129 **isolation provided in (3–5).**  
130

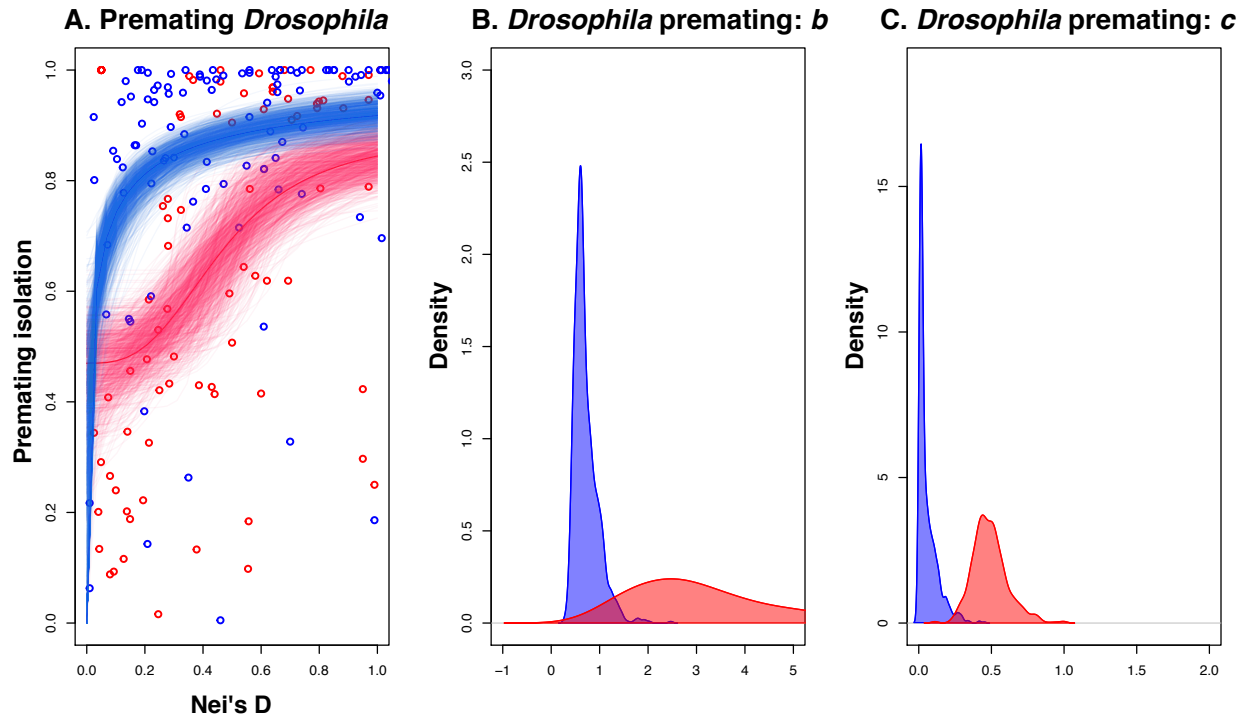

131

132  
133  
134

**SUPPLEMENTARY TABLES**

**TABLE S1. 4PL models fit the data better than linear regressions. Akaike information criterion for each fitted model.**

| <b>Taxon</b>      | <b>Barrier</b>                     | <b>Linear</b> | <b>Logistic</b> | <b>4PL</b> |
|-------------------|------------------------------------|---------------|-----------------|------------|
| <i>Drosophila</i> | <b>Premating.<br/>Allopatric</b>   | 3.111         | 7.167           | -19.557    |
| <i>Drosophila</i> | <b>Premating.<br/>Sympatric</b>    | -44.350       | -45.059         | -53.562    |
| <i>Drosophila</i> | <b>Postzygotic.<br/>Allopatric</b> | 53.975        | 53.383          | 50.630     |
| <i>Drosophila</i> | <b>Postzygotic.<br/>Sympatric</b>  | 36.043        | 138.178         | 30.949     |
| Lepidopterans     | <b>Postzygotic.<br/>Allopatric</b> | -13.427       | -16.391         | -19.366    |
| Lepidopterans     | <b>Postzygotic.<br/>Sympatric</b>  | -11.07777     | 5.3061          | -44.391    |

135  
136

137  
138  
139  
140  
141

**TABLE S2. Pairwise comparisons between coefficients of the four-parameter logistic model between sympatric and allopatric species.** To assess the significance of the difference between coefficients we compared bootstrapped distributions using a Wilcoxon test.

|                                       | <b>Coefficient</b> | <b>Coef<sub>sympatric</sub></b> | <b>Coef<sub>allopatric</sub></b> | <b>Wilcoxon test</b>                     |
|---------------------------------------|--------------------|---------------------------------|----------------------------------|------------------------------------------|
| <b>Premating, <i>Drosophila</i></b>   | <i>a</i>           | 0.184 (0.211)                   | 0.115 (0.102)                    | <i>W</i> = 468,480;<br><i>P</i> = 0.015  |
| <b>Premating, <i>Drosophila</i></b>   | <i>b</i>           | 0.740 (0.517)                   | 1.316 (0.270)                    | <i>W</i> = 949,860;<br><i>P</i> < 0.0001 |
| <b>Premating, <i>Drosophila</i></b>   | <i>c</i>           | 0.059 (0.083)                   | 0.318 (0.085)                    | <i>W</i> = 978,080;<br><i>P</i> < 0.0001 |
| <b>Premating, <i>Drosophila</i></b>   | <i>d</i>           | 1 (0)                           | 1 (0)                            | <i>W</i> = 499,000;<br><i>P</i> = NA     |
| <b>Postzygotic, <i>Drosophila</i></b> | <i>a</i>           | 0.329 (0.049)                   | 0.242 (0.050)                    | <i>W</i> = 93,010;<br><i>P</i> < 0.0001  |
| <b>Postzygotic, <i>Drosophila</i></b> | <i>b</i>           | 22.843 (9.801)                  | 9.402 (3.532)                    | <i>W</i> = 164,870;<br><i>P</i> < 0.0001 |
| <b>Postzygotic, <i>Drosophila</i></b> | <i>c</i>           | 0.439 (0.044)                   | 0.751 (0.114)                    | <i>W</i> = 993,050;<br><i>P</i> < 0.0001 |
| <b>Postzygotic, <i>Drosophila</i></b> | <i>d</i>           | 0.799(0.061)                    | 0.682 (0.091)                    | <i>W</i> = 126,760;<br><i>P</i> < 0.0001 |
| <b>Postzygotic, Lepidopterans</b>     | <i>a</i>           | 0.015 (0.025)                   | 0.043 (0.021)                    | <i>W</i> = 17155;<br><i>P</i> < 0.0001   |
| <b>Postzygotic, Lepidopterans</b>     | <i>b</i>           | 7.252 (2.955)                   | 222.696<br>(426.678)             | <i>W</i> = 1,189;<br><i>P</i> < 0.0001   |
| <b>Postzygotic, Lepidopterans</b>     | <i>c</i>           | 1 (0)                           | 0.686 (0.012)                    | <i>W</i> = 89,401;<br><i>P</i> < 0.0001  |
| <b>Postzygotic, Lepidopterans</b>     | <i>d</i>           | 1(0)                            | 0.872 (0.069)                    | <i>W</i> = 85,364;<br><i>P</i> < 0.0001  |
| <b>Postzygotic,</b>                   | <i>a</i>           | 0.062 (0.087)                   | 0.124 (0.065)                    | <i>W</i> = 739,185;                      |

|                                           |          |               |               |                                |
|-------------------------------------------|----------|---------------|---------------|--------------------------------|
| <b><i>Bufo</i> toads</b>                  |          |               |               | $P < 0.0001$                   |
| <b>Postzygotic,<br/><i>Bufo</i> toads</b> | <i>b</i> | 1.854(0.699)  | 3.520 (0.414) | $W = 971,916;$<br>$P < 0.0001$ |
| <b>Postzygotic,<br/><i>Bufo</i> toads</b> | <i>c</i> | 0.028 (0.008) | 0.038 (0.003) | $W = 877,636;$<br>$P < 0.0001$ |
| <b>Postzygotic,<br/><i>Bufo</i> toads</b> | <i>d</i> | 1 (0)         | 1 (0)         | $W = 499,000,$<br>$P = NA$     |

142  
143

144 **TABLE S3. Coefficients for a phylogenetically informed linear regression for**  
 145 **prematuring and postzygotic isolation between *Drosophila* species pairs.** The  
 146 confidence intervals are based in 5 different chains.  
 147

| Isolation          | Coefficient                                        | Isolation mean | 95% CI           | Effective sample size | pMCMC  |
|--------------------|----------------------------------------------------|----------------|------------------|-----------------------|--------|
| <b>Premating</b>   | (Intercept)                                        | 0.417          | [0.253, 0.616]   | 888.760               | <0.001 |
| <b>Premating</b>   | Genetic Distance                                   | 0.297          | [0.179, 0.414]   | 11.710                | <0.001 |
| <b>Premating</b>   | Sympatry (Sympatric-Allopatric)                    | 0.364          | [0.245, 0.464]   | 575.470               | <0.001 |
| <b>Premating</b>   | Genetic Distance × Sympatry (Sympatric-Allopatric) | -0.184         | [-0.323, -0.058] | 1,000.00              | 0.014  |
| <b>Postzygotic</b> | Intercept                                          | 0.214          | [-0.018, 0.446]  | 910.500               | 0.084  |
| <b>Postzygotic</b> | Genetic Distance                                   | 0.306          | [0.087, 0.530]   | 704.400               | 0.004  |
| <b>Postzygotic</b> | Sympatry (Sympatric-Allopatric)                    | 0.034          | [-0.121, 0.198]  | 1,000.00              | 0.660  |
| <b>Postzygotic</b> | Genetic Distance × Sympatry (Sympatric-Allopatric) | 0.388          | [0.138, 0.699]   | 984.50                | 0.002  |

148  
 149

150 **TABLE S4. Regression coefficients from a phylogenetically informed regression**  
 151 **for postzygotic isolation between Lepidopteran and *Bufo* species pairs.** The  
 152 confidence intervals are based in 5 different chains.  
 153

| <b>Group</b>             |                                                    | <b>Postzygotic mean</b> | <b>95% CI</b>    | <b>Effective sample size</b> | <b>pMCMC</b> |
|--------------------------|----------------------------------------------------|-------------------------|------------------|------------------------------|--------------|
| <b>Lepidopterans</b>     | (Intercept)                                        | -0.100                  | [-0.392, 0.273]  | 1,000.0                      | 0.488        |
| <b>Lepidopterans</b>     | Genetic Distance                                   | 0.906                   | [0.670, 1.125]   | 892.2                        | <0.001       |
| <b>Lepidopterans</b>     | Sympatry (Sympatric-Allopatric)                    | 0.123                   | [-0.018, 0.257]  | 1,000.0                      | 0.076        |
| <b>Lepidopterans</b>     | Genetic Distance × Sympatry (Sympatric-Allopatric) | -0.382                  | [-0.674, -0.093] | 1,000.0                      | 0.014        |
| <b><i>Bufo</i> frogs</b> | (Intercept)                                        | 0.502                   | [0.294, 0.691]   | 1,000.0                      | <0.001       |
| <b><i>Bufo</i> frogs</b> | Genetic Distance                                   | 4.849                   | [3.668, 5.950]   | 1,000.0                      | <0.001       |
| <b><i>Bufo</i> frogs</b> | Sympatry (Sympatric-Allopatric)                    | -0.161                  | [-0.272, -0.032] | 1,000.0                      | 0.006        |
| <b><i>Bufo</i> frogs</b> | Genetic Distance × Sympatry (Sympatric-Allopatric) | 1.938                   | [0.486, 3.637]   | 1,000.0                      | 0.012        |

154

155

156 **TABLE S5. Recently diverged species show faster accumulation of postzygotic**  
 157 **isolation when they are sympatric than when they are allopatric in *Bufo* frogs.**  
 158 Wilcoxon tests comparing the strength of postzygotic isolation in sympatry and allopatry  
 159 when using different thresholds to define young species in lepidopterans and *Bufo*  
 160 frogs. NC: regression did not converged and the analysis was not possible. Figure 3  
 161 shows similar results for pre mating and postzygotic isolation in *Drosophila*.  
 162

| <b>Group</b>             | <b>Cutoff</b> | <b>C<sub>symp</sub></b> | <b>C<sub>allop</sub></b> | <b>W</b> | <b>P-value</b> |
|--------------------------|---------------|-------------------------|--------------------------|----------|----------------|
| <b>Lepidopterans</b>     | 0.5           | NC                      | NC                       | —        | —              |
| <b>Lepidopterans</b>     | 1             | NC                      | NC                       | —        | —              |
| <b><i>Bufo</i> frogs</b> | 0.05          | 0.028                   | >0.05                    | 995,004  | <0.0001        |
| <b><i>Bufo</i> frogs</b> | 0.06          | 0.028                   | >0.06                    | 946,053  | <0.0001        |
| <b><i>Bufo</i> frogs</b> | 0.07          | 0.028                   | 0.037                    | 816,440  | <0.0001        |
| <b><i>Bufo</i> frogs</b> | 0.08          | 0.029                   | >0.08                    | 971,028  | <0.0001        |
| <b><i>Bufo</i> frogs</b> | 0.09          | 0.028                   | 0.037                    | 839,586  | <0.0001        |
| <b><i>Bufo</i> frogs</b> | 0.10          | 0.029                   | 0.038                    | 868,986  | <0.0001        |
| <b><i>Bufo</i> frogs</b> | 0.11          | 0.029                   | 0.038                    | 869,901  | <0.0001        |
| <b><i>Bufo</i> frogs</b> | 0.12          | 0.028                   | 0.038                    | 871,175  | <0.0001        |

163  
 164



165 **TABLE S6. Linear models show that the overlap of geographic range significantly**  
 166 **affects the magnitude of premating and postzygotic isolation between *Drosophila***  
 167 **species pairs.**  
 168

| <b>Response (type of barrier)</b> | <b>Model</b>   | <b>Effect</b>                 | <b>F-value</b> | <b>P-value</b>          |
|-----------------------------------|----------------|-------------------------------|----------------|-------------------------|
| <b>Premating</b>                  | Factorial      | Genetic distance (Nei's D)    | 57.187         | $7.171 \times 10^{-13}$ |
| <b>Premating</b>                  | Factorial      | % Sympatry                    | 50.809         | $1.044 \times 10^{-11}$ |
| <b>Premating</b>                  | Factorial      | Genetic distance × % Sympatry | 3.982          | 0.047                   |
| <b>Premating</b>                  | No-interaction | Genetic distance (Nei's D)    | 56.528         | $9.338 \times 10^{-13}$ |
| <b>Premating</b>                  | No-interaction | % Sympatry                    | 50.224         | $1.329 \times 10^{-11}$ |
| <b>Postzygotic</b>                | Factorial      | Genetic distance (Nei's D)    | 28.259         | $6.097 \times 10^{-7}$  |
| <b>Postzygotic</b>                | Factorial      | % Sympatry                    | 14.283         | $2.625 \times 10^{-4}$  |
| <b>Postzygotic</b>                | Factorial      | Genetic distance × % Sympatry | 2.380          | 0.126                   |
| <b>Postzygotic</b>                | No-interaction | Genetic distance (Nei's D)    | 27.892         | $6.98 \times 10^{-7}$   |
| <b>Postzygotic</b>                | No-interaction | % Sympatry                    | 14.098         | $2.85 \times 10^{-4}$   |

169  
 170

171 **TABLE S7. The effect of geographic overlap on the effect of the magnitude of**  
 172 **premating and postzygotic RI is mostly driven by species with disjoint**  
 173 **geographic ranges.** For each overlap threshold, we fit a linear model in which the  
 174 strength of isolation, either premating or postzygotic, depends on genetic distance and  
 175 the percentage of overlap (% sympatry).  
 176

| RI type            | Lower threshold (not included) | Nei's <i>D</i>  |                         | % sympatry      |                         |
|--------------------|--------------------------------|-----------------|-------------------------|-----------------|-------------------------|
|                    |                                | <i>F</i> -value | <i>P</i> -value         | <i>F</i> -value | <i>P</i> -value         |
| <b>Premating</b>   | All data                       | 56.528          | $9.338 \times 10^{-13}$ | 50.22           | $1.329 \times 10^{-11}$ |
| <b>Premating</b>   | 0.00                           | 10.873          | $1.268 \times 10^{-3}$  | 7.022           | $9.082 \times 10^{-3}$  |
| <b>Premating</b>   | 0.01                           | 10.873          | $1.268 \times 10^{-3}$  | 7.022           | $9.082 \times 10^{-3}$  |
| <b>Premating</b>   | 0.02                           | 10.450          | $1.569 \times 10^{-3}$  | 7.487           | $7.121 \times 10^{-3}$  |
| <b>Premating</b>   | 0.03                           | 8.946           | $3.36 \times 10^{-3}$   | 6.704           | 0.011                   |
| <b>Premating</b>   | 0.04                           | 9.158           | $3.030 \times 10^{-3}$  | 8.601           | $4.026 \times 10^{-3}$  |
| <b>Premating</b>   | 0.05                           | 9.443           | $2.637 \times 10^{-3}$  | 3.242           | 0.074                   |
| <b>Premating</b>   | 0.10                           | 9.920           | $2.101 \times 10^{-3}$  | 0.095           | 0.758                   |
| <b>Postzygotic</b> | All data                       | 27.892          | $6.98 \times 10^{-7}$   | 14.098          | $2.85 \times 10^{-3}$   |
| <b>Postzygotic</b> | 0.00                           | 16.626          | $1.632 \times 10^{-4}$  | 1.520           | 0.223                   |
| <b>Postzygotic</b> | 0.01                           | 16.626          | $1.632 \times 10^{-4}$  | 1.520           | 0.223                   |
| <b>Postzygotic</b> | 0.02                           | 16.626          | $1.632 \times 10^{-4}$  | 1.520           | 0.223                   |
| <b>Postzygotic</b> | 0.03                           | 14.006          | $4.788 \times 10^{-4}$  | 1.459           | 0.233                   |
| <b>Postzygotic</b> | 0.04                           | 14.274          | $4.443 \times 10^{-4}$  | 2.355           | 0.132                   |
| <b>Postzygotic</b> | 0.05                           | 14.263          | $4.549 \times 10^{-4}$  | 2.841           | 0.090                   |
| <b>Postzygotic</b> | 0.10                           | 12.629          | $9.371 \times 10^{-4}$  | 3.641           | 0.063                   |

177  
 178  
 179

180  
181

**TABLE S8. Datasets that have compiled data on the magnitude of reproductive isolation in multiple species pairs of animals.**

|                   | <i>N</i> | Premating isolation | Postzygotic isolation | Distance | Geographic status | Reference |
|-------------------|----------|---------------------|-----------------------|----------|-------------------|-----------|
| <i>Drosophila</i> | 630      | X                   | X                     | X        | X                 | (6)       |
| Toads             | 669      |                     | X                     | X        | X                 | (7, 8)    |
| Lepidoptera       | 212      |                     | X                     | X        | X                 | (9)       |
| <i>Heliconius</i> | 12       | X                   | X                     | X        |                   | (10)      |
| Birds             | 407      |                     | X                     | X        |                   | (11)      |
| Sticklebacks      | 5        | X                   | X                     | X        |                   | (12)      |
| Centrarchid fish  | 130      |                     | X                     | X        |                   | (13)      |

182  
183  
184
